# Supplementary material
Source: Springer Nature journal article supplement (https://www.springermedizin.de/resource/supplementary/13000_2013_1107_MOESM10_ESM.pdf/9625820)

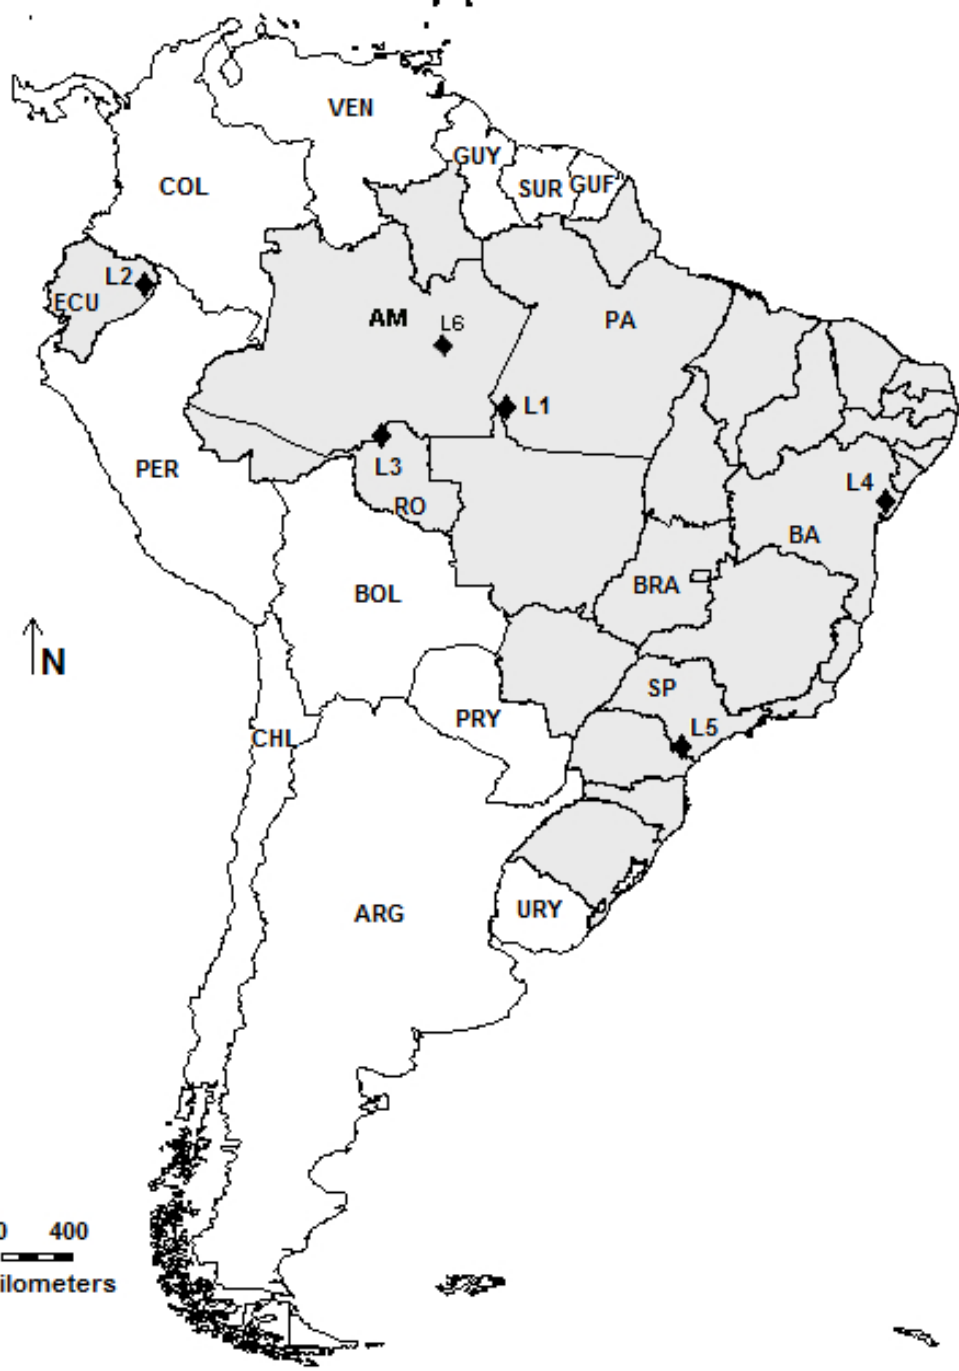

Supplement: MOESM10 [file 9625820]
